# Supplementary material for: Natural variation in Arabidopsis shoot branching plasticity in response to nitrate supply affects fitness
Source: PubMed Central journal article supplement (PMC6774567; doi:10.1371/journal.pgen.1008366), 2019-09-20
Supplement: pgen.1008366.s010.pdf [file pgen.1008366.s010.pdf]

| <b>Gene name<br/>(TAIR ID)</b> | <b>Forward primer<br/>(5' --&gt; 3')</b> | <b>Reverse primer<br/>(5' --&gt; 3')</b> | <b>Nitrate response<br/>(reference)</b> |
|--------------------------------|------------------------------------------|------------------------------------------|-----------------------------------------|
| UBC9<br>(AT4G27960)            | TGTACAAGACAGACAAGAACAAGTACGA             | TGTGTCAGCCCATGGCATA                      | reference gene                          |
| APX3<br>(AT4G35000)            | GCCGTGAGCTCCGTTCTCT                      | TCGTGCCATGCCAATCG                        | reference gene                          |
| NRT1.1<br>(AT1G12110)          | GTGGCCTCCTCCTAACCACC                     | CATAGACGAATGGCGACGC                      | upregulated<br>[36]                     |
| NRT2.1<br>(AT1G08090)          | GGGCTAACGTGGATGGGAGT                     | GCAAACCGGAGGCTTCCTTG                     | upregulated<br>[36]                     |
| NIR1<br>(AT2G15620)            | TGCTTAACACGAGGCGAGG                      | GTACACGTCAGCACCTCGA                      | upregulated<br>[36]                     |
| NIA1<br>(AT1G77760)            | CGGTAATCGCCGCAAGGAAC                     | TAGCCGGATCCATCGCCATC                     | upregulated<br>[36]                     |
| G6PD3<br>(AT1G24280)           | CTACGCTTCTCCTCAGGGGC                     | ACGGACCTCCTCTGCGATC                      | upregulated<br>[36]                     |
| GLN2<br>(AT5G35630)            | ACACTCCTGTGGGAGCCAAC                     | GCTTTTGAGCTGCAAGGGC                      | upregulated<br>[98]                     |
| GLN1-1/GSR1<br>(AT5G37600)     | GTGCTGGTGCTCACTGCAAC                     | GGTTCGCAACACCCCAAAGG                     | downregulated<br>[97]                   |
